# Supplementary material
Source: HighWire-hosted journal article supplement (https://bmjopen.bmj.com/content/12/9/e056236)
Supplement: inline-supplementary-material-1 [file inline-supplementary-material-1.pdf]

Table S1. Standardized questionnaire for collecting data on statin followed up

| <b>SECTION 3: CURRENT MEDCIATIONS (if patient alive)</b> |                                                                                                                                                                                                                                                                                                                                                                                                                                                                                                                                                                                                                                                                                                                                                                                       |                                     |                             |   |   |                              |                                |   |   |                   |                                         |  |                                          |  |                           |  |                               |  |                                |  |                                      |  |                                  |  |                                                |
|----------------------------------------------------------|---------------------------------------------------------------------------------------------------------------------------------------------------------------------------------------------------------------------------------------------------------------------------------------------------------------------------------------------------------------------------------------------------------------------------------------------------------------------------------------------------------------------------------------------------------------------------------------------------------------------------------------------------------------------------------------------------------------------------------------------------------------------------------------|-------------------------------------|-----------------------------|---|---|------------------------------|--------------------------------|---|---|-------------------|-----------------------------------------|--|------------------------------------------|--|---------------------------|--|-------------------------------|--|--------------------------------|--|--------------------------------------|--|----------------------------------|--|------------------------------------------------|
| <b>3.25</b>                                              | <table><tr><td>Statin <input type="checkbox"/> Yes</td><td><input type="checkbox"/> No</td></tr><tr><td>↓</td><td>↓</td></tr><tr><td>If yes, trade name is: _____</td><td>If no, reason is: (select one)</td></tr><tr><td>↓</td><td>↓</td></tr><tr><td>Dose _____ mg/day</td><td><input type="checkbox"/> Not prescribed</td></tr><tr><td></td><td><input type="checkbox"/> Patient refused</td></tr><tr><td></td><td>↓ Reason is: (select one)</td></tr><tr><td></td><td><input type="checkbox"/> Cost</td></tr><tr><td></td><td><input type="checkbox"/> Other</td></tr><tr><td></td><td><input type="checkbox"/> Intolerance</td></tr><tr><td></td><td><input type="checkbox"/> Unknown</td></tr><tr><td></td><td><input type="checkbox"/> Other (specify) _____</td></tr></table> | Statin <input type="checkbox"/> Yes | <input type="checkbox"/> No | ↓ | ↓ | If yes, trade name is: _____ | If no, reason is: (select one) | ↓ | ↓ | Dose _____ mg/day | <input type="checkbox"/> Not prescribed |  | <input type="checkbox"/> Patient refused |  | ↓ Reason is: (select one) |  | <input type="checkbox"/> Cost |  | <input type="checkbox"/> Other |  | <input type="checkbox"/> Intolerance |  | <input type="checkbox"/> Unknown |  | <input type="checkbox"/> Other (specify) _____ |
| Statin <input type="checkbox"/> Yes                      | <input type="checkbox"/> No                                                                                                                                                                                                                                                                                                                                                                                                                                                                                                                                                                                                                                                                                                                                                           |                                     |                             |   |   |                              |                                |   |   |                   |                                         |  |                                          |  |                           |  |                               |  |                                |  |                                      |  |                                  |  |                                                |
| ↓                                                        | ↓                                                                                                                                                                                                                                                                                                                                                                                                                                                                                                                                                                                                                                                                                                                                                                                     |                                     |                             |   |   |                              |                                |   |   |                   |                                         |  |                                          |  |                           |  |                               |  |                                |  |                                      |  |                                  |  |                                                |
| If yes, trade name is: _____                             | If no, reason is: (select one)                                                                                                                                                                                                                                                                                                                                                                                                                                                                                                                                                                                                                                                                                                                                                        |                                     |                             |   |   |                              |                                |   |   |                   |                                         |  |                                          |  |                           |  |                               |  |                                |  |                                      |  |                                  |  |                                                |
| ↓                                                        | ↓                                                                                                                                                                                                                                                                                                                                                                                                                                                                                                                                                                                                                                                                                                                                                                                     |                                     |                             |   |   |                              |                                |   |   |                   |                                         |  |                                          |  |                           |  |                               |  |                                |  |                                      |  |                                  |  |                                                |
| Dose _____ mg/day                                        | <input type="checkbox"/> Not prescribed                                                                                                                                                                                                                                                                                                                                                                                                                                                                                                                                                                                                                                                                                                                                               |                                     |                             |   |   |                              |                                |   |   |                   |                                         |  |                                          |  |                           |  |                               |  |                                |  |                                      |  |                                  |  |                                                |
|                                                          | <input type="checkbox"/> Patient refused                                                                                                                                                                                                                                                                                                                                                                                                                                                                                                                                                                                                                                                                                                                                              |                                     |                             |   |   |                              |                                |   |   |                   |                                         |  |                                          |  |                           |  |                               |  |                                |  |                                      |  |                                  |  |                                                |
|                                                          | ↓ Reason is: (select one)                                                                                                                                                                                                                                                                                                                                                                                                                                                                                                                                                                                                                                                                                                                                                             |                                     |                             |   |   |                              |                                |   |   |                   |                                         |  |                                          |  |                           |  |                               |  |                                |  |                                      |  |                                  |  |                                                |
|                                                          | <input type="checkbox"/> Cost                                                                                                                                                                                                                                                                                                                                                                                                                                                                                                                                                                                                                                                                                                                                                         |                                     |                             |   |   |                              |                                |   |   |                   |                                         |  |                                          |  |                           |  |                               |  |                                |  |                                      |  |                                  |  |                                                |
|                                                          | <input type="checkbox"/> Other                                                                                                                                                                                                                                                                                                                                                                                                                                                                                                                                                                                                                                                                                                                                                        |                                     |                             |   |   |                              |                                |   |   |                   |                                         |  |                                          |  |                           |  |                               |  |                                |  |                                      |  |                                  |  |                                                |
|                                                          | <input type="checkbox"/> Intolerance                                                                                                                                                                                                                                                                                                                                                                                                                                                                                                                                                                                                                                                                                                                                                  |                                     |                             |   |   |                              |                                |   |   |                   |                                         |  |                                          |  |                           |  |                               |  |                                |  |                                      |  |                                  |  |                                                |
|                                                          | <input type="checkbox"/> Unknown                                                                                                                                                                                                                                                                                                                                                                                                                                                                                                                                                                                                                                                                                                                                                      |                                     |                             |   |   |                              |                                |   |   |                   |                                         |  |                                          |  |                           |  |                               |  |                                |  |                                      |  |                                  |  |                                                |
|                                                          | <input type="checkbox"/> Other (specify) _____                                                                                                                                                                                                                                                                                                                                                                                                                                                                                                                                                                                                                                                                                                                                        |                                     |                             |   |   |                              |                                |   |   |                   |                                         |  |                                          |  |                           |  |                               |  |                                |  |                                      |  |                                  |  |                                                |

**Table S2:** Dosage of different type of statins with equivalent efficacy on lipid measures

| Equivalent dosages of statins (mg) |                  |                 |                  |                  | Efficacy in mean reduction of lipid measures (%) |       |       |          |
|------------------------------------|------------------|-----------------|------------------|------------------|--------------------------------------------------|-------|-------|----------|
| Atorva-<br>statin                  | Simva-<br>statin | Lova-<br>statin | Prava-<br>statin | Fluva-<br>statin | TC                                               | LDL-C | HDL-C | TG       |
| -                                  | 10               | 20              | 20               | 40               | -22                                              | -27   | 4~8   | -(10~15) |
| 10                                 | 20               | 40              | 40               | 80               | -27                                              | -34   | 4~8   | -(10~20) |
| 20                                 | 40               | 80              |                  |                  | -32                                              | -41   | 4~8   | -(15~25) |
| 40                                 | 80               |                 |                  |                  | -37                                              | -48   | 4~8   | -(20~30) |
| 80                                 |                  |                 |                  |                  | -42                                              | -55   | 4~8   | -(25~35) |

Source: P Jones 1, S Kafonek, I Laurora, D Hunninghake. Comparative dose efficacy study of atorvastatin versus simvastatin, pravastatin, lovastatin, and fluvastatin in patients with hypercholesterolemia (the CURVES study) .Am J Cardiol, 1998 Mar 1;81(5):582-7. doi: 10.1016/s0002-9149(97)00965-x. (Reference No. 24 in the main text).

Table S3. Comparison of characteristics of patients with ACS between those followed-up and those lost to follow-up

| Characteristics               | Followed-up<br>(n=10337) |      | Lost to follow-up<br>(n=2742) |      | P values |
|-------------------------------|--------------------------|------|-------------------------------|------|----------|
|                               | n                        | %    | n                             | %    |          |
| Year of enrolment             |                          |      |                               |      |          |
| 2007                          | 383                      | 3.7  | 161                           | 5.9  | <0.001   |
| 2008                          | 3309                     | 32.0 | 874                           | 31.9 |          |
| 2009                          | 4982                     | 48.2 | 1170                          | 42.7 |          |
| 2010                          | 1663                     | 16.1 | 537                           | 19.6 |          |
| Subtype of ACS                |                          |      |                               |      |          |
| STEMI*                        | 3918                     | 37.9 | 1284                          | 46.8 | <0.001   |
| NSTEMI*                       | 1394                     | 13.5 | 409                           | 14.9 |          |
| UA*                           | 5025                     | 48.6 | 1049                          | 38.3 |          |
| Clinical pathway intervention | 7908                     | 76.5 | 2077                          | 75.8 | 0.409    |
| Sex (Female)                  | 3074                     | 29.7 | 791                           | 28.9 | 0.364    |
| Age>=65                       | 4934                     | 47.7 | 1381                          | 50.4 | 0.014    |
| Education>=high school        | 3786                     | 36.6 | 1028                          | 37.5 | 0.404    |
| Unemployed                    | 5033                     | 48.7 | 1494                          | 54.5 | <0.001   |
| With medical insurance        | 8678                     | 83.9 | 2172                          | 79.2 | <0.001   |
| Current smoker                | 3192                     | 30.9 | 906                           | 33.0 | 0.030    |
| History of disease            |                          |      |                               |      |          |
| Dyslipidemia                  | 1359                     | 13.1 | 315                           | 11.5 | 0.021    |
| Diabetes                      | 2086                     | 20.2 | 529                           | 19.3 | 0.302    |
| Hypertension                  | 7184                     | 69.5 | 1798                          | 65.6 | <0.001   |
| Heart Failure                 | 562                      | 5.4  | 160                           | 5.8  | 0.417    |
| Stroke                        | 944                      | 9.1  | 278                           | 10.1 | 0.107    |
| In-hospital MACE              | 191                      | 1.8  | 283                           | 10.3 | <0.001   |
| In-hospital PCI/CABG          | 5113                     | 49.5 | 1471                          | 53.7 | <0.001   |
| LDL-c level in hospital       |                          |      |                               |      |          |
| Not measuring                 | 909                      | 8.8  | 299                           | 10.9 | 0.003    |
| <160mg/dl                     | 8850                     | 85.6 | 2287                          | 83.4 |          |
| >=160mg/dl                    | 578                      | 5.6  | 156                           | 5.7  |          |
| Prior statin use              | 1467                     | 14.2 | 381                           | 13.9 | 0.692    |
| Dose of statin at discharge   |                          |      |                               |      |          |
| 1-9 mg/d                      | 1904                     | 18.4 | 672                           | 24.5 | <0.001   |
| 10-19 mg/d                    | 3196                     | 30.9 | 500                           | 18.2 |          |
| >=20 mg/d                     | 5237                     | 50.7 | 1570                          | 57.3 |          |
| Type of statin at discharge   |                          |      |                               |      |          |
| Atorvastatin                  | 5785                     | 56.0 | 1712                          | 62.4 | <0.001   |
| Simvastatin                   | 2690                     | 26.0 | 509                           | 18.6 |          |
| Rosuvastatin                  | 502                      | 4.9  | 40                            | 1.5  |          |
| Pravastatin                   | 502                      | 4.9  | 163                           | 5.9  |          |

|                            |       |      |      |      |        |
|----------------------------|-------|------|------|------|--------|
| Fluvastatin                | 578   | 5.6  | 166  | 6.1  |        |
| Other statin               | 280   | 2.7  | 152  | 5.5  |        |
| Co-treatments at discharge |       |      |      |      |        |
| Aspirin                    | 10030 | 97.0 | 2645 | 96.5 | 0.127  |
| Clopidogrel                | 8404  | 81.3 | 2416 | 88.1 | <0.001 |
| $\beta$ -blocker           | 8155  | 78.9 | 2076 | 75.7 | <0.001 |
| ACEI/ARB*                  | 8096  | 78.3 | 2161 | 78.8 | 0.579  |

\* STEMI was ST-segment elevation myocardial infarction; NSTEMI was Non-ST-segment elevation myocardial infarction; UA was unstable angina; ACEI was Angiotensin converting enzyme inhibitor; ARB was Angiotensin Receptor Blocker
